# Supplementary material for: Knowledge-Driven Mechanistic Enrichment of the Preeclampsia Ignorome
Source: PubMed Central journal article supplement — Pac Symp Biocomput. Author manuscript; Available in PMC 2023 Jan 1. (PMC9782728), 2023
Supplement: NIHMS1853001-supplement-Supplementary.pdf [file NIHMS1853001-supplement-Supplementary.pdf]

# Knowledge-Driven Mechanism Enrichment of the Preeclampsia Ignorome

Tiffany J. Callahan MPH, PhD<sup>1,2</sup>; Adrienne L. Stefanski PhD<sup>2</sup>; Jin-Dong Kim PhD<sup>3</sup>; William A. Baumgartner Jr. PhD<sup>2</sup>; Jordan M. Wyrwa DO<sup>4</sup>; Lawrence E. Hunter PhD<sup>2</sup>

<sup>1</sup>Department of Biomedical Informatics, Columbia University, New York, NY USA

<sup>2</sup>Computational Bioscience Program, University of Colorado Anschutz Medical Campus, Aurora, CO USA

<sup>3</sup>Database Center for Life Science, Research Organization of Information and Systems, Kashiwa, Japan

<sup>4</sup>Department of Physical Medicine and Rehabilitation, School of Medicine, University of Colorado Anschutz Medical Campus, Aurora, CO USA

## SUPPLEMENTAL MATERIAL

This section provides additional information on the preeclampsia ignorome studies obtained from the Gene Expression Omnibus that were examined as part of our meta-analysis.

### Table of Contents

#### Keyword lists

|                                                                                                     |    |
|-----------------------------------------------------------------------------------------------------|----|
| Supplemental Figure 1. t-SNE plot of PheKnowLator Node Embeddings with Preeclampsia Ignorome Genes. | 2  |
| Supplemental Table 1. Status of Reviewed Preeclampsia GEO Studies.                                  | 3  |
| Supplemental Table 2. Final Set of GEO Studies and Differentially Expressed Gene Count by Study.    | 6  |
| Supplemental Table 3. Gene Symbols by Preeclampsia-Annotated Article Count.                         | 7  |
| Supplemental Table 4. PheKnowLator-Derived Novel Phenotype Associations.                            | 8  |
| Supplemental Table 5. PheKnowLator-Derived Novel Pathway Associations.                              | 9  |
| Supplemental Table 6. PheKnowLator-Derived Novel Drug Associations.                                 | 10 |
| Supplemental Table 7. PheKnowLator-Derived Novel Gene Associations.                                 | 11 |
| Supplemental Table 8. PheKnowLator-Derived Novel Gene Ontology Associations.                        | 13 |
| Supplemental Table 9. PheKnowLator-Derived Novel Disease Associations.                              | 14 |

## Keyword lists

**Literature-Driven Keywords:** "Preeclampsia", "HELLP Syndrome", "Severe Preeclampsia", and "Placenta Disease"

**Gene-Driven Keywords:** "HELLP Syndrome", "gestational hypertension", "hypertensive disorders of pregnancy", "pre-eclampsia", "pre-eclamptic patient", "pre-eclamptic toxemia", "pre-eclamptic toxemia", "preeclampsia", "preeclamptic toxemia", "preeclamptic toxemia", "pregnancy hypertension", "pregnancy-related hypertensive disorder", "toxemia of pregnancy", "toxemic mother", "toxemic pregnancy", "toxemia of pregnancy", "toxemic mother", "toxemic pregnancy"

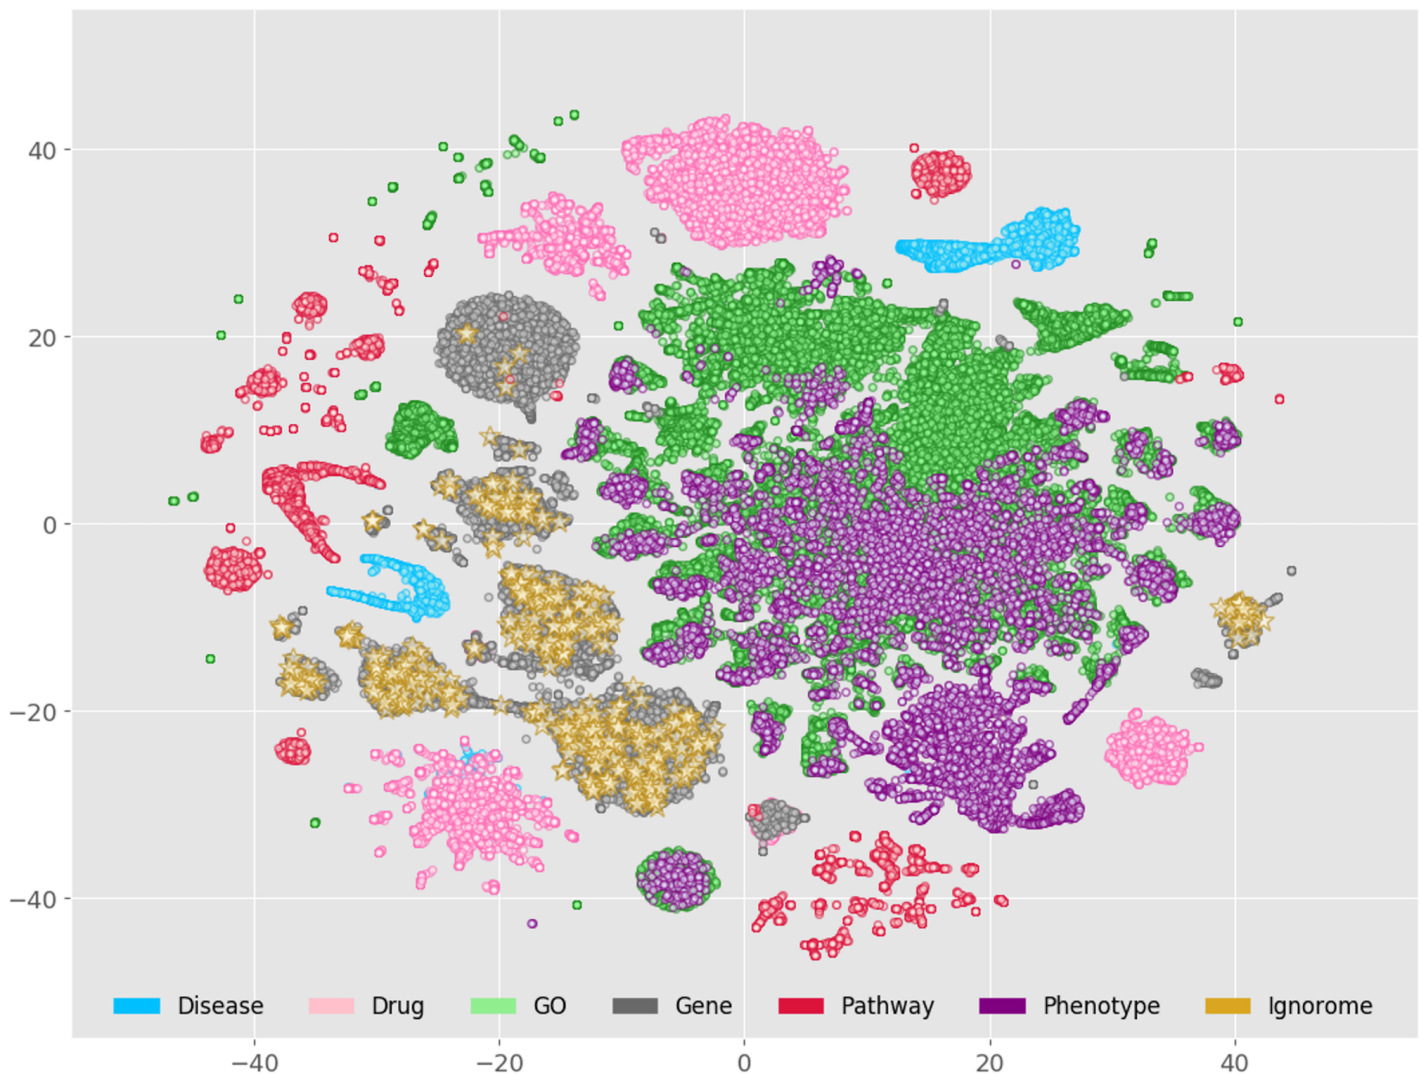

**Supplemental Figure 1.** t-SNE plot of PheKnowLator Node Embeddings with Preeclampsia Ignorome Genes.

The nodes are colored by biological type (i.e., disease [blue], drugs [pink], gene ontology concepts [green], genes [gray], pathways [red], and phenotypes [purple]) and ignorome genes indicated with gold stars.

**Supplemental Table 1.** Status of Reviewed Preeclampsia GEO Studies.

| Source | GSE      | Decision | Exclusion Reason                                                    |
|--------|----------|----------|---------------------------------------------------------------------|
| GEO    | GSE10588 | Include  |                                                                     |
| GEO    | GSE24129 | Include  |                                                                     |
| GEO    | GSE73374 | Include  |                                                                     |
| GEO    | GSE14722 | Include  |                                                                     |
| GEO    | GSE4707  | Include  |                                                                     |
| GEO    | GSE74341 | Include  |                                                                     |
| GEO    | GSE25906 | Include  |                                                                     |
| GEO    | GSE35574 | Include  |                                                                     |
| GEO    | GSE30186 | Include  |                                                                     |
| GEO    | GSE44711 | Include  |                                                                     |
| GEO    | GSE60438 | Include  |                                                                     |
| GEO    | GSE43942 | Include  |                                                                     |
| GEO    | GSE75010 | Exclude  | May help with post hoc interpretation                               |
| GEO    | GSE12767 | Exclude  | May help with post hoc interpretation                               |
| GEO    | GSE85307 | Exclude  | May help with post hoc interpretation                               |
| GEO    | GSE91189 | Exclude  | Laser microdissection of cell types                                 |
| GEO    | GSE93839 | Exclude  | Laser microdissection of cell types                                 |
| GEO    | GSE94643 | Exclude  | Laser microdissection of cell types                                 |
| GEO    | GSE94644 | Exclude  | Laser microdissection of cell types                                 |
| GEO    | GSE6573  | Exclude  | Only 2 samples in the placenta condition                            |
| GEO    | GSE47187 | Exclude  | Control and case occur on the same probe, but in different channels |
| GEO    | GSE12216 | Exclude  | Not preeclampsia                                                    |
| GEO    | GSE13155 | Exclude  | Not preeclampsia                                                    |
| GEO    | GSE41681 | Exclude  | Not placenta biopsy; cultured HUVECs                                |
| GEO    | GSE13475 | Exclude  | Not placenta biopsy; cell culture                                   |
| GEO    | GSE4100  | Exclude  | Not placenta biopsy; cell culture                                   |
| GEO    | GSE54400 | Exclude  | Not placenta biopsy                                                 |
| GEO    | GSE86200 | Exclude  | Not placenta biopsy                                                 |
| GEO    | GSE48424 | Exclude  | Not placenta biopsy                                                 |
| GEO    | GSE91077 | Exclude  | Not placenta biopsy                                                 |
| GEO    | GSE79782 | Exclude  | Not placenta biopsy                                                 |

| Source | GSE      | Decision | Exclusion Reason                                              |
|--------|----------|----------|---------------------------------------------------------------|
| GEO    | GSE79781 | Exclude  | Not placenta biopsy                                           |
| GEO    | GSE79783 | Exclude  | Not placenta biopsy                                           |
| GEO    | GSE99007 | Exclude  | May help cell type contribution of DEG signature              |
| GEO    | GSE38747 | Exclude  | May help cell type contribution of DEG signature              |
| GEO    | GSE93020 | Exclude  | Not gene expression; not transcriptome                        |
| GEO    | GSE49343 | Exclude  | Not gene expression; not transcriptome                        |
| GEO    | GSE84260 | Exclude  | Not gene expression; not transcriptome                        |
| GEO    | GSE69452 | Exclude  | Not gene expression; not transcriptome                        |
| GEO    | GSE63743 | Exclude  | Not gene expression; not transcriptome                        |
| GEO    | GSE57767 | Exclude  | Not gene expression; not transcriptome                        |
| GEO    | GSE73375 | Exclude  | Not gene expression; not transcriptome                        |
| GEO    | GSE75196 | Exclude  | Not gene expression; not transcriptome                        |
| GEO    | GSE44667 | Exclude  | Not gene expression; not transcriptome                        |
| GEO    | GSE59274 | Exclude  | Not gene expression; not transcriptome                        |
| GEO    | GSE75941 | Exclude  | Not gene expression; not transcriptome                        |
| GEO    | GSE41336 | Exclude  | Not gene expression; not transcriptome                        |
| GEO    | GSE63999 | Exclude  | Not gene expression; not transcriptome                        |
| GEO    | GSE50783 | Exclude  | Not gene expression; not transcriptome                        |
| GEO    | GSE98938 | Exclude  | Not gene expression; not transcriptome                        |
| GEO    | GSE97898 | Exclude  | Not gene expression; not transcriptome                        |
| GEO    | GSE15789 | Exclude  | Not gene expression; not transcriptome                        |
| GEO    | GSE65271 | Exclude  | In vitro HTR8svneo                                            |
| GEO    | GSE37901 | Exclude  | Gestational age inconsistent with study design                |
| GEO    | GSE36083 | Exclude  | First trimester explants                                      |
| GEO    | GSE59686 | Exclude  | Fetal membranes; not true placental biopsy                    |
| GEO    | GSE74446 | Exclude  | Ex vivo cultured placental explants                           |
| GEO    | GSE40182 | Exclude  | Ex vivo cultured placental cells                              |
| GEO    | GSE41331 | Exclude  | Ex vivo cultured placental cells                              |
| GEO    | GSE73377 | Exclude  | Contains GSE73375 and GSE73374 (used GSE73374 for expression) |
| GEO    | GSE44712 | Exclude  | Contains GSE4467 and GSE44711 (used GSE44711 for expression)  |
| GEO    | GSE31679 | Exclude  | Cells cultures in vitro                                       |
| GEO    | GSE64272 | Exclude  | In vitro hESCs and iPSCs                                      |

| Source | GSE      | Decision | Exclusion Reason                                          |
|--------|----------|----------|-----------------------------------------------------------|
| GEO    | GSE72712 | Exclude  | In vitro hESCs                                            |
| GEO    | GSE22526 | Exclude  | No control samples; may help with post hoc interpretation |
| GEO    | GSE13299 | Exclude  | No control samples; may help with post hoc interpretation |
| GEO    | GSE9984  | Exclude  | May help with post hoc interpretation                     |
| GEO    | GSE25861 | Exclude  | May help cell type contribution of DEG signature          |
| GEO    | GSE54618 | Exclude  | Questionable, recommend excluding                         |

**Supplemental Table 2.** Final Set of GEO Studies and Differentially Expressed Gene Count by Study.

| GSE ID    | PMID     | Date | Platform Details               | Study Groups                                         | Analysis Groups                    | Sample             | DEGs                 |
|-----------|----------|------|--------------------------------|------------------------------------------------------|------------------------------------|--------------------|----------------------|
| GSE4707   | 16860862 | 2006 | Agilent-012391<br>G4112A       | Control (n=4)<br>EO (n=5)<br>LO (n=5)                | Control vs. EO<br>Control vs. LO   | Placenta           | EO: 4091<br>LO: 2075 |
| GSE10588  | 19249095 | 2008 | ABI Human<br>Genome V2.0       | Control (n=26)<br>SPE (n=17)                         | Control vs. SEP                    | Placenta           | 5049                 |
| GSE25906  | 21183218 | 2010 | Illumina<br>Human-6 v2.0       | Control (n=37)<br>PE (n=23)                          | Control vs. PE                     | Placenta           | 2616                 |
| GSE14722  | 18818296 | 2009 | Affymetrix<br>U133A/U133B      | PT Basal Plate<br>(n=11)<br>PE Basal Plate<br>(n=12) | Control vs. PE                     | Basal plate        | 551                  |
| GSE24129  | 21810232 | 2010 | Affymetrix HG<br>1.0           | Control (n=8)<br>FGR (n=8)<br>PE (n=8)               | Control vs. FGR<br>Control vs. PE  | Placenta           | FGR: 0<br>PE: 981    |
| GSE30186  | 22702245 | 2011 | Illumina<br>HumanHT-12<br>V4.0 | Control (n=6)<br>PE (n=6)                            | Control vs. PE                     | Placenta           | 201                  |
| GSE43942* | 23544093 | 2013 | NimbleGen<br>HG18              | Control (n=12)<br>PE (n=12)                          | Control vs. PE                     | placenta           | 1411                 |
| GSE74341  | 27016783 | 2015 | Agilent<br>SurePrint G3        | AT (n=5)<br>EO (n=7)<br>PT (n=5)<br>LO (n=8)         | PT vs. EO<br>AT vs. LO             | Placenta           | EO: 9627<br>LO: 6589 |
| GSE35574  | 23639576 | 2012 | Illumina<br>Human-6 v2.0       | Control (n=40)<br>IUGR (n=35)<br>PE (n=19)           | Control vs. IUGR<br>Control vs. PE | Placenta           | IUGR: 0<br>PE: 4519  |
| GSE44711  | 23770704 | 2013 | Illumina<br>HumanHT-12<br>V4.0 | Control (n=8)<br>EO PE (n=8)                         | Control vs. EO                     | Chorionic<br>villi | 500                  |
| GSE60438  | 26010865 | 2014 | Illumina<br>HumanWG-6<br>v3.0  | Control (n=23)<br>PE (n=25)                          | Control vs. PE                     | Decidua<br>basalis | 7228                 |
| GSE73374  | 26510177 | 2015 | Affymetrix HG<br>2.0           | Control (n=17)<br>PE (n=19)                          | Control vs. PE                     | Placenta           | 2678                 |

Acronyms - AT: At Term; DEGs: Differentially Expressed Genes ( $p < 0.05$ ); EO: Early Onset; FGR: Fetal Growth Restriction; IUGR: Intrauterine Growth Restriction; LO: Late Onset; PE: Preeclampsia; PT: Preterm; SEP: Severe Preeclampsia.

\*Downloaded differentially expressed gene list directly from authors.

**Supplemental Table 3. Gene Symbols by Preeclampsia-Annotated Article Count.**

| Article Count | Gene Symbols                                                                                                                                                                                                                                                                                                                                                                                                                                                                                                                                                                |
|---------------|-----------------------------------------------------------------------------------------------------------------------------------------------------------------------------------------------------------------------------------------------------------------------------------------------------------------------------------------------------------------------------------------------------------------------------------------------------------------------------------------------------------------------------------------------------------------------------|
| 0             | PRRG1, ZFPL1, ZNF84, ZNF646, TM9SF1, LMAN2, ILVBL, SMG5, NIPSNAP3A, ZNF330, CCDC59, SCCPDH, NIN, MBIP, KLHL28, EPS8L1, MRPS18A, LRRC1, ZNF83, CCDC47, PRRG4, RPAP3, SFXN3, RPF2, MIDN, ZNF439, TIGD7, SNX29, RDH13, LENG8, LRRC56, PUSL1, HINT3, ZNF555, CRYGN, CXorf38, ZNF114, LONRF2, DCP2, C6orf89, EP400NL, RNF222                                                                                                                                                                                                                                                     |
| 1             | ACTR3B, ADAMTSL3, AGFG1, ANXA7, ARHGAP9, ATXN7L2, BZW1, CHKA, CNOT3, CRIM1, DNAJB2, DNAJC1, DOK3, DOK6, ECM2, ENTPD4, ERFFI1, FAM120A, FBXO9, FRMD3, FXYD3, GART, HDGF, HERC4, HPCAL1, IL1RAP, IREB2, KTN1, LEO1, MAGT1, MBNL1, MFAP5, MRPL18, NFIA, NKTR, NRP2, OLFML3, ORMDL1, OSTF1, PAM, PCYOX1, PHYHIPL, POLR2H, PPP1R14B, PRKD3, PSPC1, RAPGEF3, RASGRP2, RBPMS, RFK, RGL1, RHOQ, RHPN1, SH3BGRL, SH3KBP1, SHPRH, SLC35F2, SNX3, SRP9, TARBP1, TBC1D22A, TBL1XR1, TCF7, TCP1, TGOLN2, TMEM136, TUBB, UBE2H, UPF3A, WDFY3, XPOT, YPEL4, ZFAND5, ZNF440, ZNF473         |
| 2             | APLP2, BIN2, ELL2, ENTPD1, KIAA0753, KLHL7, LASP1, MICAL1, MRPL3, NAALAD2, POGZ, PPP6R3, SCP2, SDF2L1, SNAPC4, SSFA2, STK11IP, THAP5, TMEM30A, TRIM14, WBP2, ZBTB48, ZCCHC2, ZFAND2B, ZNF7, CUL2, DST, HOXB5, MBD2, MPHOSPH8, MPPE1, PTP4A1, RARRES1, SLC28A1, SLC2A3, SLC2A5, SLC9A9, TPR, ANAPC4                                                                                                                                                                                                                                                                          |
| 3             | AP3S1, ATP11B, CLIC4, CSNK1G3, DSCC1, EEF1A1, GON4L, GOSR2, GPR155, HIGD1A, LIMCH1, MPHOSPH10, PNCK, PSMA2, RNF13, RPL18, SPTLC3, SSNA1, TAOK1, UGP2, CDH15, GGA1, NSF, PTGDS, TPT1, ANTXR1, LONP1, NECTIN4, PROCR, SETD1A, TRAF3, TRIM24                                                                                                                                                                                                                                                                                                                                   |
| 4-5           | CLASP2, EFHD1, HMGCS1, KCNMB4, KIF2A, MARCH6, PDZRN3, GFPT1, H3F3B, QPCT, HIP1, NAIP, RNF123, APMAP, ARHGEF4, COBLL1, HIPK3, NOC3L, RGS11, SLC30A5, NDFIP1, NEBL, MARS, PHF10, STX1A, IQGAP1                                                                                                                                                                                                                                                                                                                                                                                |
| 6-10          | BRWD1, COPS8, DNAJC10, LYPLA1, METAP1, NR2C1, PDE4DIP, TMEM45A, TRAK1, MAN1A1, PARP6, ZNF644, SLC35A2, STX16, TSPAN7, ACSS1, ALDH9A1, ARL6IP1, GDPD5, NFYC, RPS2, SLBP, TBCD, WTAP, FRMD4B, NEK11, PPM1K, SPATA13, BCAS4, KCTD11, BMP6, NDUFS7, TAF15, LRPPRC, DNAJC3, ERGIC1, GREM2, OMA1, PGLYRP1, PKP4, SPON1, YME1L1, YWHAB, DMTF1, IFITM2, ME2, MYO1B, ALDOA, HERC2, ACO2, ARRDC3, DDR1, HBD, ATXN10, ANKRD26, PBX2, RNF8, ACTR3, PPP2R5C, RASEF, USP10, JUP, CRIP2, NFIX, SCARB1, SLCO2A1, ASCC3, HIF3A, IGSF8, ARHGAP21, BAIAP2, MYT1, PDXK, LAMB1, MCFD2, MME, TFAM |
| 11-20         | BASP1, CEP72, CSNK2B, FASTK, USP11, CD164, ETNK1, TMED5, UCHL5, KRT19, MNT, NUS1, CCND2, QKI, SPG7, MXI1, TSNAX, PCBP2, STK38, E2F5, CETN2, STK17B, SEC63, RASSF8, DERL3, OLFM1, ZNF185, ANXA4, TPI1, PLOD1, CCAR1, RPS6KA5, BTF3, SSR1, STK24, PLA2G16, CFLAR, NCOA1, CTTN, SEMA7A, LRRFIP1, TLE4, GSR, HNMT, HDAC9, LMAN1, GALE, TAOK2, ATRN, FAM107B, TMED1, TMED10, RPN2, MGAT3, MKNK1, SLC27A2, NUDT6, CCNC, CSNK1A1, BCORL1, RAB6B, MATR3, PIK3CB                                                                                                                     |
| 21-30         | ARID3A, CD37, SLC44A1, PAQR3, ACSL3, RAP1GDS1, POLR3A, RHEB, ECD, DVL2, HILPDA, FOXF1, NEDD4L, BCAT1, CDO1, EXOSC6, CHD8, DYRK1A, ELL, RBBP4, PPP1R15A, ING5, CXXC1, PRPS1                                                                                                                                                                                                                                                                                                                                                                                                  |
| 31-50         | TRIM29, PSMC6, CALM1, KDM3A, YES1, CSNK2A2, DNM2, FBLN5, C2, ANGPTL1, ITPR1, SNAI2, KLF10, TUG1, CTSZ, CDH23, VPS35, PSME3, NPL, CTSK, SMG1, YWHAE, VPS13A, AGL, AMD1, GLUL, HEXB, BSG                                                                                                                                                                                                                                                                                                                                                                                      |
| 51-100        | LSP1, NUCB2, CEBPZ, SLC16A3, SLC6A8, PICALM, RASSF7, CSTB, SREBF1, MKKS, LPIN1, TRAF2, TPP1, PTPRU, BACH1, RNPC3, FHIT, LGALS3, AKAP12, EDNRB, BMP1, DCK                                                                                                                                                                                                                                                                                                                                                                                                                    |
| >100          | STS, SET, GHR, NDRG2, CLN3, ATXN2, KHDRBS1, SPP1, PDXP, DMPK, NPEPPS, GBA, CIB1, PMP22, IDH1, TARDBP, BRAF                                                                                                                                                                                                                                                                                                                                                                                                                                                                  |

**Supplemental Table 4.** PheKnowLator-Derived Novel Phenotype Associations.

| Identifier                                                                | Ignorome Hits                                 | Domain Expert-Derived Evidence                                                                                                                                                                                                           |
|---------------------------------------------------------------------------|-----------------------------------------------|------------------------------------------------------------------------------------------------------------------------------------------------------------------------------------------------------------------------------------------|
| Abnormal Mitochondria in Muscle Tissue<br>( <a href="#">HP:0008316</a> )  | NDUFS7<br>( <a href="#">ncbigene:374291</a> ) | Mitochondrial dysfunction is central to the pathophysiology of preeclampsia ( <a href="#">PMID: 33417666</a> ). Trophoblast mitochondrial function is impaired in preeclampsia ( <a href="#">PMID: 27939475</a> ).                       |
| Systemic Lupus Erythematosus<br>( <a href="#">HP:0002725</a> )            | C2<br>( <a href="#">ncbigene:717</a> )        | Women diagnosed with systemic lupus erythematosus are at increased risk of preeclampsia ( <a href="#">PMID: 31754886</a> ).                                                                                                              |
| Persistence of Hemoglobin F<br>( <a href="#">HP:0011904</a> )             | HBD<br>( <a href="#">ncbigene:3045</a> )      | Increased fetal hemoglobin accumulation in the placenta is associated with preeclampsia ( <a href="#">PMID: 25628568</a> ; <a href="#">PMID: 24185004</a> ).                                                                             |
| Elevated Plasma Branched Chain Amino Acids ( <a href="#">HP:0008344</a> ) | PPM1K<br>( <a href="#">ncbigene:152926</a> )  | Plasma branched chain amino acids were higher in women with gestational diabetes mellitus than control ( <a href="#">PMID: 31497040</a> ). Gestational diabetes mellitus increases preeclampsia risk ( <a href="#">PMID: 25644816</a> ). |
| Microcytic Anemia ( <a href="#">HP:0001935</a> )                          | HBD<br>( <a href="#">ncbigene:3045</a> )      | Severe anemia is associated with higher risk of preeclampsia ( <a href="#">PMID: 21867566</a> ).                                                                                                                                         |

Acronyms - HP: Human Phenotype Ontology; NCBIGene: National Center for Biotechnology Information Entrez gene identifier.



**Supplemental Table 5. PheKnowLator-Derived Novel Pathway Associations.**

| Identifier                                                                                | Ignorome Hits                                                                                                                                                                                                                       | Domain Expert-Derived Mechanism(s)                                                                                                                                                                                                                                                                                                                                                                                  |
|-------------------------------------------------------------------------------------------|-------------------------------------------------------------------------------------------------------------------------------------------------------------------------------------------------------------------------------------|---------------------------------------------------------------------------------------------------------------------------------------------------------------------------------------------------------------------------------------------------------------------------------------------------------------------------------------------------------------------------------------------------------------------|
| Complex I Biogenesis<br>( <a href="#">R-HSA-6799198</a> )                                 | NDUFS7 ( <a href="#">ncbigene:374291</a> )                                                                                                                                                                                          | Trophoblasts cultured under hypoxic conditions have decreased Complex I respiration rate ( <a href="#">PMID: 23383105</a> ). Hypoxia is thought to be central to the pathophysiology of preeclampsia ( <a href="#">PMID: 30968806</a> ).                                                                                                                                                                            |
| Mitochondrial Translation Termination<br>( <a href="#">R-HSA-5419276</a> )                | MRPL3 ( <a href="#">ncbigene:11222</a> ),<br>MRPS18A ( <a href="#">ncbigene:55168</a> ),<br>MRPL18 ( <a href="#">ncbigene:29074</a> )                                                                                               | Mitochondrial dysfunction is central to the pathophysiology of preeclampsia ( <a href="#">PMID: 33417666</a> ). Trophoblast mitochondrial function is impaired in preeclampsia ( <a href="#">PMID: 27939475</a> ).                                                                                                                                                                                                  |
| Respiratory Electron Transport<br>( <a href="#">R-HSA-611105</a> )                        | NDUFS7 ( <a href="#">ncbigene:374291</a> ),<br>LRPPRC ( <a href="#">ncbigene:10128</a> )                                                                                                                                            | Placentas from preeclamptic pregnancies had decreased expression of essential electron transport chain proteins ( <a href="#">PMID: 32916282</a> ). Abnormal electron transport is associated with early-onset preeclampsia ( <a href="#">PMID: 29676857</a> ).                                                                                                                                                     |
| Elastic Fibre Formation<br>( <a href="#">R-HSA-1566948</a> )                              | MFAP5 ( <a href="#">ncbigene:8076</a> ),<br>FBLN5 ( <a href="#">ncbigene:10516</a> )                                                                                                                                                | The elastic fibre system is altered in umbilical cord vessels from pregnancies complicated by preeclampsia ( <a href="#">PMID: 10794169</a> ).                                                                                                                                                                                                                                                                      |
| Diseases Associated with O-glycosylation of Proteins<br>( <a href="#">R-HSA-3906995</a> ) | ADAMTSL3 ( <a href="#">ncbigene:57188</a> ),<br>SPON1 ( <a href="#">ncbigene:10418</a> )                                                                                                                                            | Altered o-glycosylation is associated with aberrant immune cell dynamics at the maternal-fetal interface ( <a href="#">PMID: 32760395</a> ). In severe preeclampsia, altered glycosylation of maternal plasma proteins is associated with increased monocyte adhesion ( <a href="#">PMID: 23757314</a> ).                                                                                                           |
| Rho GTPase Cycle<br>( <a href="#">R-HSA-194840</a> )                                      | RHOQ ( <a href="#">ncbigene:23433</a> ),<br>RHPN1 ( <a href="#">ncbigene:114822</a> ),<br>ARHGEF4 ( <a href="#">ncbigene:50649</a> ),<br>ARHGAP9 ( <a href="#">ncbigene:64333</a> ),<br>ARHGAP21 ( <a href="#">ncbigene:57584</a> ) | Human trophoblast migration is modulated by Rho GTPases ( <a href="#">PMID: 21940708</a> ). Rho GTPases, RAC1 and CDC42, are required for prostaglandin E2-mediated human trophoblast migration ( <a href="#">PMID: 18235104</a> ).                                                                                                                                                                                 |
| Protein Folding<br>( <a href="#">R-HSA-391251</a> )                                       | TCP1 ( <a href="#">ncbigene:6950</a> ),<br>RGS11 ( <a href="#">ncbigene:8786</a> ),<br>TBCD ( <a href="#">ncbigene:6904</a> )                                                                                                       | Protein misfolding and protein aggregation are associated with preeclampsia ( <a href="#">PMID:31817906</a> ).                                                                                                                                                                                                                                                                                                      |
| Resolution of Sister Chromatid Cohesion<br>( <a href="#">R-HSA-2500257</a> )              | TAOK1 ( <a href="#">ncbigene:57551</a> ),<br>CLASP2 ( <a href="#">ncbigene:23122</a> )                                                                                                                                              | TAOK1 negatively regulates IL-17 signaling ( <a href="#">PMID: 29400705</a> ). In preeclampsia, IL-17 is increased in maternal serum and placentas ( <a href="#">PMID: 32416889</a> ). Human extravillous trophoblasts undergo endoreduplication ( <a href="#">PMID: 22877079</a> ). Abnormalities of extravillous trophoblasts have been extensively described in preeclampsia ( <a href="#">PMID: 29701150</a> ). |
| Interferon Signaling<br>( <a href="#">R-HSA-913531</a> )                                  | TRIM29 ( <a href="#">ncbigene:23650</a> ),<br>IFITM2 ( <a href="#">ncbigene:10581</a> ),<br>TRIM14 ( <a href="#">ncbigene:9830</a> )                                                                                                | Alterations in placental expression of IFN-gamma and its receptor are associated with preeclampsia pathophysiology ( <a href="#">PMID: 15585559</a> ). Increased expression IFN-gamma is associated with impaired trophoblast invasion and migration <i>in vitro</i> ( <a href="#">PMID: 33335575</a> ).                                                                                                            |
| Epigenetic Regulation of Gene Expression<br>( <a href="#">R-HSA-212165</a> )              | MBD2 ( <a href="#">ncbigene:8932</a> )                                                                                                                                                                                              | Placentas from pregnancies complicated by preeclampsia exhibit alterations in methylation and gene expression ( <a href="#">PMID: 31212604</a> ).                                                                                                                                                                                                                                                                   |

Acronyms - R-HSA: Reactome Pathway Database; NCBI Gene: National Center for Biotechnology Information Entrez gene identifier.

**Supplemental Table 6. PheKnowLator-Derived Novel Drug Associations.**

| Identifier                                                           | Ignorome Hits                                 | Domain Expert-Derived Mechanism(s)                                                                                                                                                                                                                                                                                                                                                     |
|----------------------------------------------------------------------|-----------------------------------------------|----------------------------------------------------------------------------------------------------------------------------------------------------------------------------------------------------------------------------------------------------------------------------------------------------------------------------------------------------------------------------------------|
| Flavin Mononucleotide<br>( <a href="#">MeSH:D005486</a> )            | RFK ( <a href="#">ncbigene:55312</a> )        | Riboflavin-deficient women are more likely to develop preeclampsia ( <a href="#">PMID:10862839</a> ).                                                                                                                                                                                                                                                                                  |
| 17-benzyl-5-androstane-3,17-diol<br>( <a href="#">MeSH:C445526</a> ) | STS ( <a href="#">ncbigene:412</a> )          | 17-benzyl-5-androstane-3,17-diol is an inhibitor of steroid sulfatase ( <a href="#">PMID: 11600235</a> ). Steroid sulfatase is increased during preeclampsia in both placenta and maternal blood and modulates s-Flt1 ( <a href="#">PMID: 27871476</a> ).                                                                                                                              |
| Sodium Borate<br>( <a href="#">MeSH:C010634</a> )                    | STS ( <a href="#">ncbigene:412</a> )          | Boron participates in Vitamin D metabolism ( <a href="#">PMID: 29207789</a> ). Maternal Vitamin D levels are associated with preeclampsia risk ( <a href="#">PMID: 27841759</a> ).                                                                                                                                                                                                     |
| Estranes<br>( <a href="#">MeSH:D004962</a> )                         | STS ( <a href="#">ncbigene:412</a> )          | Oral contraceptive use for 8 or more years before pregnancy is associated with increased risk of preeclampsia ( <a href="#">PMID: 10640157</a> ).                                                                                                                                                                                                                                      |
| HDL Cholesteryl Ester<br>( <a href="#">MeSH:C059714</a> )            | SCARB1 ( <a href="#">ncbigene:949</a> )       | In preeclampsia, decreased levels of HDL-c have been observed during the third trimester ( <a href="#">PMID: 24989239</a> ). The HDL-c of women with preeclampsia exhibits oxidative damage ( <a href="#">PMID: 28511654</a> ).                                                                                                                                                        |
| Glycogen<br>( <a href="#">MeSH:D006003</a> )                         | AGL ( <a href="#">ncbigene:178</a> )          | Villous syncytiotrophoblast microvesicles isolated from placentas from pregnancies complicated by preeclampsia have increased glycogen content ( <a href="#">PMID: 8514882</a> ).                                                                                                                                                                                                      |
| Enrasentan<br>( <a href="#">MeSH:C098288</a> )                       | EDNRB ( <a href="#">ncbigene:1910</a> )       | Enrasentan is a high-affinity antagonist of Endothelin Type A Receptor ( <a href="#">PMID: 12595914</a> ). Endothelin Type A Receptor antagonism has been suggested as a potential therapeutic strategy for preeclampsia ( <a href="#">PMID: 28264495</a> , <a href="#">PMID: 31221823</a> ).                                                                                          |
| Anti-Asthmatic Agents<br>( <a href="#">MeSH:D018927</a> )            | MME ( <a href="#">ncbigene:4311</a> )         | Women who experience symptomatic asthma during pregnancy have an increased risk of preeclampsia ( <a href="#">PMID: 16572909</a> ).                                                                                                                                                                                                                                                    |
| Magnesium Oxide<br>( <a href="#">MeSH:D008277</a> )                  | CFLAR ( <a href="#">ncbigene:8837</a> )       | During a clinical trial, significantly fewer women developed hypertension during pregnancy when supplemented with magnesium oxide ( <a href="#">PMID: 1492408</a> ).                                                                                                                                                                                                                   |
| Sitagliptin Phosphate<br>( <a href="#">MeSH:D000068900</a> )         | NAALAD2<br>( <a href="#">ncbigene:10003</a> ) | In gestational diabetes mellitus, Sitagliptin Phosphate ameliorates insulin resistance ( <a href="#">PMID: 28213841</a> ). Preeclampsia is associated with increased risk of gestational diabetes mellitus in later pregnancies ( <a href="#">PMID: 28542483</a> ). Women who experience preeclampsia are at increased risk of developing diabetes ( <a href="#">PMID: 27646865</a> ). |

Acronyms - MeSH: Medical Subject Headings; NCBI Gene: National Center for Biotechnology Information Entrez gene identifier.

**Supplemental Table 7. PheKnowLator-Derived Novel Gene Associations.**

| Identifier                                           | Ignorome Hits                                                                                                                                                                                                                                                                                                                                                                                                                                                                                                                                  | Domain Expert-Derived Mechanism(s)                                                                                                                                                                                                                                                                                                   |
|------------------------------------------------------|------------------------------------------------------------------------------------------------------------------------------------------------------------------------------------------------------------------------------------------------------------------------------------------------------------------------------------------------------------------------------------------------------------------------------------------------------------------------------------------------------------------------------------------------|--------------------------------------------------------------------------------------------------------------------------------------------------------------------------------------------------------------------------------------------------------------------------------------------------------------------------------------|
| <p>PLOD2<br/>(<a href="#">ncbigene:5352</a>)</p>     | <p>PLOD1 (<a href="#">ncbigene:5351</a>),<br/>FBLN5 (<a href="#">ncbigene:10516</a>), PTGDS<br/>(<a href="#">ncbigene:5730</a>)</p>                                                                                                                                                                                                                                                                                                                                                                                                            | <p>Plod2, a protein associated with extracellular matrix remodeling, is upregulated in trophoblast stem cells cultured under hypoxic conditions (<a href="#">PMID: 27807143</a>). Hypoxia is thought to be central to the pathophysiology of preeclampsia (<a href="#">PMID: 30968806</a>).</p>                                      |
| <p>KCNMB3<br/>(<a href="#">ncbigene:27094</a>)</p>   | <p>KCNMB4 (<a href="#">ncbigene:27345</a>)</p>                                                                                                                                                                                                                                                                                                                                                                                                                                                                                                 | <p>KCNMB3 was differentially methylated at 2 CpG sites in cord blood samples obtained from pregnancies conceived using assisted reproductive technologies (<a href="#">PMID: 25580569</a>). Women who conceive using assistive reproductive technologies are at increased risk of preeclampsia (<a href="#">PMID: 31046710</a>).</p> |
| <p>NDUFB3<br/>(<a href="#">ncbigene:4709</a>)</p>    | <p>NDUFS7 (<a href="#">ncbigene:374291</a>),<br/>SPG7 (<a href="#">ncbigene:6687</a>),<br/>LRPPRC (<a href="#">ncbigene:10128</a>),<br/>YME1L1 (<a href="#">ncbigene:10730</a>)</p>                                                                                                                                                                                                                                                                                                                                                            | <p>Trophoblasts cultured under hypoxic conditions have decreased Complex I respiration rate (<a href="#">PMID: 23383105</a>). Hypoxia is thought to be central to the pathophysiology of preeclampsia (<a href="#">PMID: 30968806</a>).</p>                                                                                          |
| <p>MRPL32<br/>(<a href="#">ncbigene:64983</a>)</p>   | <p>MRPL3 (<a href="#">ncbigene:11222</a>),<br/>MRPS18A (<a href="#">ncbigene:55168</a>),<br/>MRPL18 (<a href="#">ncbigene:29074</a>)</p>                                                                                                                                                                                                                                                                                                                                                                                                       | <p>Increased oxidative stress is central to preeclampsia pathogenesis (<a href="#">PMID: 20110125</a>). Oxidative stress is associated with alterations in folding and degradation of MrpL32 (<a href="#">PMID: 21610694</a>).</p>                                                                                                   |
| <p>HGB1<br/>(<a href="#">ncbigene:3047</a>)</p>      | <p>HBD (<a href="#">ncbigene:3045</a>)</p>                                                                                                                                                                                                                                                                                                                                                                                                                                                                                                     | <p>Increased fetal hemoglobin accumulation in the placenta is associated with preeclampsia (<a href="#">PMID: 25628568</a>, <a href="#">PMID: 24185004</a>).</p>                                                                                                                                                                     |
| <p>RBBP7<br/>(<a href="#">ncbigene:5931</a>)</p>     | <p>RBBP4 (<a href="#">ncbigene:5928</a>),<br/>HDAC9 (<a href="#">ncbigene:9734</a>),<br/>SETD1A (<a href="#">ncbigene:9739</a>),<br/>ING5 (<a href="#">ncbigene:84289</a>),<br/>CSNK2A2 (<a href="#">ncbigene:1459</a>),<br/>E2F5 (<a href="#">ncbigene:1875</a>),<br/>H3F3B (<a href="#">ncbigene:3021</a>),<br/>KDM3A (<a href="#">ncbigene:55818</a>),<br/>MPHOSPH8 (<a href="#">ncbigene:54737</a>),<br/>MBD2 (<a href="#">ncbigene:8932</a>),<br/>CXXC1 (<a href="#">ncbigene:30827</a>),<br/>BCORL1 (<a href="#">ncbigene:63035</a>)</p> | <p>RBBP7 was identified using co-expression network analysis as a gene to prioritize for investigation for association with preeclampsia (<a href="#">PMID: 24219996</a>).</p>                                                                                                                                                       |
| <p>SLC30A7<br/>(<a href="#">ncbigene:148867</a>)</p> | <p>SLC30A5 (<a href="#">ncbigene:64924</a>)</p>                                                                                                                                                                                                                                                                                                                                                                                                                                                                                                | <p>SLC30A7 is involved in regulation of cellular zinc and low levels of serum zinc are associated with preeclampsia (<a href="#">PMID: 26389947</a>).</p>                                                                                                                                                                            |
| <p>SLC44A5<br/>(<a href="#">ncbigene:204962</a>)</p> | <p>SLC44A1 (<a href="#">ncbigene:23446</a>)</p>                                                                                                                                                                                                                                                                                                                                                                                                                                                                                                | <p>SLCA44A5 is a choline transporter, and choline supplementation down-regulates preeclampsia-associated protein sFLT1 (<a href="#">PMID: 23195033</a>).</p>                                                                                                                                                                         |

| Identifier                                                                                                                                                                                                                                                                                                                                                                                                                                                                | Ignorome Hits                                                                                                                                                                                                                                                                                                  | Domain Expert-Derived Mechanism(s)                                                                                                                                                                             |
|---------------------------------------------------------------------------------------------------------------------------------------------------------------------------------------------------------------------------------------------------------------------------------------------------------------------------------------------------------------------------------------------------------------------------------------------------------------------------|----------------------------------------------------------------------------------------------------------------------------------------------------------------------------------------------------------------------------------------------------------------------------------------------------------------|----------------------------------------------------------------------------------------------------------------------------------------------------------------------------------------------------------------|
| <p>RHOQ<br/>RHPN1<br/>BIN2<br/>ARHGEF4<br/>ARHGAP9<br/>ARHGAP21<br/>RAP1GDS1<br/>SPATA13</p> <p>RHOQ (<a href="#">ncbigene:23433</a>),<br/>RHPN1 (<a href="#">ncbigene:114822</a>),<br/>BIN2 (<a href="#">ncbigene:51411</a>),<br/>ARHGEF4 (<a href="#">ncbigene:50649</a>),<br/>ARHGAP9 (<a href="#">ncbigene:64333</a>),<br/>ARHGAP21 (<a href="#">ncbigene:57584</a>),<br/>RAP1GDS1 (<a href="#">ncbigene:5910</a>),<br/>SPATA13 (<a href="#">ncbigene:221178</a>)</p> | <p>JAK/STAT signaling alters EGF-induced trophoblast invasion <i>in vitro</i> (<a href="#">PMID: 28542650</a>). RhoU is downstream of the JAK/STAT signaling pathway (<a href="#">PMID: 29440639</a>).</p>                                                                                                     | <p>JAK/STAT signaling alters EGF-induced trophoblast invasion <i>in vitro</i> (<a href="#">PMID: 28542650</a>). RhoU is downstream of the JAK/STAT signaling pathway (<a href="#">PMID: 29440639</a>).</p>     |
| <p>CCT2</p> <p>CCT2 (<a href="#">ncbigene:10576</a>)</p>                                                                                                                                                                                                                                                                                                                                                                                                                  | <p>TCP1 (<a href="#">ncbigene:6950</a>),<br/>STK24 (<a href="#">ncbigene:8428</a>),<br/>DNAJC3 (<a href="#">ncbigene:5611</a>),<br/>USP11 (<a href="#">ncbigene:8237</a>),<br/>MKKS (<a href="#">ncbigene:8195</a>),<br/>RGS11 (<a href="#">ncbigene:8786</a>),<br/>DNAJB2 (<a href="#">ncbigene:3300</a>)</p> | <p>Analysis of differentially expressed genes in preeclampsia reveals disruption of the CCT2-containing pathway “formation of tubulin-folding intermediates by CCT/Tric” (<a href="#">PMID: 30589053</a>).</p> |

Acronyms - HP: Human Phenotype Ontology; NCBIGene: National Center for Biotechnology Information Entrez gene identifier.

**Supplemental Table 8. PheKnowLator-Derived Novel Gene Ontology Associations.**

| Identifier                                                                  | Ignorome Hits                                                                                                                                                                                                                                                                                                          | Domain Expert-Derived Mechanism(s)                                                                                                                                                                                                                                                                                                                                                                                  |
|-----------------------------------------------------------------------------|------------------------------------------------------------------------------------------------------------------------------------------------------------------------------------------------------------------------------------------------------------------------------------------------------------------------|---------------------------------------------------------------------------------------------------------------------------------------------------------------------------------------------------------------------------------------------------------------------------------------------------------------------------------------------------------------------------------------------------------------------|
| Mitochondrial Translational Elongation<br>( <a href="#">GO:0070125</a> )    | MRPL3 ( <a href="#">ncbigene:11222</a> ),<br>MRPS18A ( <a href="#">ncbigene:55168</a> ),<br>MRPL18 ( <a href="#">ncbigene:29074</a> )                                                                                                                                                                                  | Mitochondrial dysfunction is central to the pathophysiology of preeclampsia ( <a href="#">PMID: 33417666</a> ). Trophoblast mitochondrial function is impaired in preeclampsia ( <a href="#">PMID: 27939475</a> ).                                                                                                                                                                                                  |
| Cellular Zinc Ion Homeostasis<br>( <a href="#">GO:0006882</a> )             | SLC30A5 ( <a href="#">ncbigene:64924</a> )                                                                                                                                                                                                                                                                             | Preeclampsia is associated with lower levels of zinc in maternal serum ( <a href="#">PMID: 26389947</a> ).                                                                                                                                                                                                                                                                                                          |
| Mitochondrial Respiratory Chain Complex I<br>( <a href="#">GO:0005747</a> ) | NDUFS7 ( <a href="#">ncbigene:374291</a> )                                                                                                                                                                                                                                                                             | Trophoblasts cultured under hypoxic conditions have decreased Complex I respiration rate ( <a href="#">PMID: 23383105</a> ). Hypoxia is thought to be central to the pathophysiology of preeclampsia ( <a href="#">PMID: 30968806</a> ).                                                                                                                                                                            |
| Cul2-RING Ubiquitin Ligase Complex<br>( <a href="#">GO:0031462</a> )        | CUL2 ( <a href="#">ncbigene:8453</a> )                                                                                                                                                                                                                                                                                 | miRNA-584 is differentially expressed in preeclampsia and targets CUL2 ( <a href="#">PMID: 27529341</a> ).                                                                                                                                                                                                                                                                                                          |
| Hemoglobin Complex<br>( <a href="#">GO:0005833</a> )                        | HBD ( <a href="#">ncbigene:3045</a> )                                                                                                                                                                                                                                                                                  | Maternal hemoglobin concentration is associated with higher odds of preeclampsia ( <a href="#">PMID: 30994929</a> ).                                                                                                                                                                                                                                                                                                |
| Calmodulin Binding<br>( <a href="#">GO:0005516</a> )                        | CALM1 ( <a href="#">ncbigene:801</a> ),<br>IQGAP1 ( <a href="#">ncbigene:8826</a> ),<br>BASP1 ( <a href="#">ncbigene:10409</a> ),<br>MYO1B ( <a href="#">ncbigene:4430</a> ),<br>PNCK ( <a href="#">ncbigene:139728</a> )                                                                                              | CALM1 (Calmodulin 1) is differentially expressed in severe early-onset preeclampsia ( <a href="#">PMID: 33754042</a> ). A protein-protein interaction network identified IQGAP1 as related to preeclampsia but poorly explored or of unknown preeclampsia pathophysiology ( <a href="#">PMID: 22873350</a> ).                                                                                                       |
| Sister Chromatid Cohesion<br>( <a href="#">GO:0007062</a> )                 | TAOK1 ( <a href="#">ncbigene:57551</a> ),<br>CLASP2 ( <a href="#">ncbigene:23122</a> )                                                                                                                                                                                                                                 | TAOK1 negatively regulates IL-17 signaling ( <a href="#">PMID: 29400705</a> ). In preeclampsia, IL-17 is increased in maternal serum and placentas ( <a href="#">PMID: 32416889</a> ). Human extravillous trophoblasts undergo endoreduplication ( <a href="#">PMID: 22877079</a> ). Abnormalities of extravillous trophoblasts have been extensively described in preeclampsia ( <a href="#">PMID: 29701150</a> ). |
| Histone Binding<br>( <a href="#">GO:0042393</a> )                           | H3F3B ( <a href="#">ncbigene:3021</a> ),<br>MPHOSPH8 ( <a href="#">ncbigene:54737</a> ),<br>SET ( <a href="#">ncbigene:6418</a> )                                                                                                                                                                                      | Human trophoblast differentiation is associated with epigenetic changes ( <a href="#">PMID: 31294776</a> ). Preeclampsia is associated with epigenetic alterations ( <a href="#">PMID: 31343798</a> ). H3F3B is induced in preeclampsia ( <a href="#">PMID: 16129025</a> ).                                                                                                                                         |
| mRNA Splicing, via Spliceosome<br>( <a href="#">GO:0000398</a> )            | RNPC3 ( <a href="#">ncbigene:55599</a> ),<br>ECD ( <a href="#">ncbigene:11319</a> ),<br>CCAR1 ( <a href="#">ncbigene:55749</a> ),<br>PCBP2 ( <a href="#">ncbigene:5094</a> )                                                                                                                                           | Alternative splicing affects many placental and preeclampsia-related genes ( <a href="#">PMID: 33433680</a> ). Alternative splice variants of sFlt1 ( <a href="#">PMID: 19147226</a> ) mineralocorticoid receptor ( <a href="#">PMID: 31197761</a> ) are associated with preeclampsia.                                                                                                                              |
| Actin Filament Binding<br>( <a href="#">GO:0051015</a> )                    | ACTR3 ( <a href="#">ncbigene:10096</a> ),<br>NEBL ( <a href="#">ncbigene:10529</a> ),<br>ACTR3B ( <a href="#">ncbigene:57180</a> ),<br>MYO1B ( <a href="#">ncbigene:4430</a> ),<br>COBL1 ( <a href="#">ncbigene:22837</a> ),<br>ZNF185 ( <a href="#">ncbigene:7739</a> ),<br>ITPRID2 ( <a href="#">ncbigene:6744</a> ) | Preeclampsia is associated with altered actin polymerization via endothelial protein C receptor ( <a href="#">PMID: 32003123</a> ).                                                                                                                                                                                                                                                                                 |

Acronyms - GO: Gene Ontology; NCBI Gene: National Center for Biotechnology Information Entrez gene identifier.

**Supplemental Table 9. PheKnowLator-Derived Novel Disease Associations.**

| Identifier                                                             | Ignorome Hits                             | Domain Expert-Derived Mechanism(s)                                                                                                                                                                                                                                                                                                                                                                                                                        |
|------------------------------------------------------------------------|-------------------------------------------|-----------------------------------------------------------------------------------------------------------------------------------------------------------------------------------------------------------------------------------------------------------------------------------------------------------------------------------------------------------------------------------------------------------------------------------------------------------|
| Galactosemia ( <a href="#">DOID:9870</a> )                             | GALE ( <a href="#">ncbigene:2582</a> )    | Galactosemia is caused by mutations in one of three genes needed to metabolize galactose to glucose: GALT, GALK1, and GALE ( <a href="#">PMID: 30451973</a> ). Hypoglycemia can present clinically as galactosemia ( <a href="#">PMID: 9832597</a> ). Preeclampsia increases the risk of neonatal hypoglycemia ( <a href="#">PMID: 22525036</a> ).                                                                                                        |
| X-linked Ichthyosis ( <a href="#">DOID:1700</a> )                      | STS ( <a href="#">ncbigene:412</a> )      | X-linked ichthyosis is a rare dermatological condition caused by STS deficiency ( <a href="#">PMID: 30768640</a> ). STS expression is increased in preeclamptic placentas and maternal whole blood ( <a href="#">PMID: 27871476</a> ).                                                                                                                                                                                                                    |
| Progressive Bulbar Palsy ( <a href="#">DOID:681</a> )                  | RFK ( <a href="#">ncbigene:55312</a> )    | Riboflavin Kinase is an essential enzyme for catalyzing the phosphorylation of riboflavin ( <a href="#">PMID:12623014</a> ). Progressive bulbar palsy is caused by riboflavin transporter deficiency ( <a href="#">PMID: 26973221</a> ). Riboflavin deficiency is a known risk factor for preeclampsia ( <a href="#">PMID: 10862839</a> ).                                                                                                                |
| Amyotrophic Lateral Sclerosis ( <a href="#">DOID:332</a> )             | TARDBP ( <a href="#">ncbigene:23435</a> ) | TARDBP encodes the protein TDP-43 which accumulates in amyotrophic lateral sclerosis ( <a href="#">PMID: 28476168</a> ). AhR agonists increase TDP-43 in neurons. Placentas with high AhR expression during fetal development are highly susceptible to environmental toxicants ( <a href="#">PMID:20354149</a> ). AhR has been proposed as a mechanism for the protective effects of cigarette smoke on preeclampsia ( <a href="#">PMID: 21864991</a> ). |
| Attention Deficit Hyperactivity Disorder ( <a href="#">DOID:1094</a> ) | STS ( <a href="#">ncbigene:412</a> )      | The association between attention deficit hyperactivity disorder and STS dysfunction has been well established ( <a href="#">PMID: 21255266</a> ). Offspring of preeclamptic mothers are 3-fold more likely to be diagnosed with attention deficit hyperactivity disorder ( <a href="#">PMID: 30605798</a> ).                                                                                                                                             |
| Pleural Cancer ( <a href="#">DOID:5158</a> )                           | SPP1 ( <a href="#">ncbigene:6696</a> )    | SPP1 (secreted) has been shown to both regulate angiogenesis and inflammation associated with tumor growth and promote cancer cell survival, elements vital to the pathogenesis of pleural cancer ( <a href="#">PMID: 22370646</a> ). SPP1 has been to be increased in preeclamptic patients with endothelial injuries ( <a href="#">PMID: 19943814</a> ).                                                                                                |
| Gaucher's Disease ( <a href="#">DOID:1926</a> )                        | GBA ( <a href="#">ncbigene:2629</a> )     | Gaucher's disease is caused by mutations in GBA ( <a href="#">PMID: 18338393</a> ). It's been hypothesized that increased GBA expression might relate to placentation through decreased BMP4 signaling or vascularization through downregulation of TFEB ( <a href="#">PMID: 25552189</a> ).                                                                                                                                                              |
| Fatty Liver Disease ( <a href="#">DOID:9452</a> )                      | STS ( <a href="#">ncbigene:412</a> )      | STS expression has been shown to be induced in response to inflammation-activated NF-κB, a recognized mechanism in the development of chronic inflammatory liver disease ( <a href="#">PMID: 26220752</a> ). STS expression is increased in the placenta and maternal whole blood samples of preeclamptic patients ( <a href="#">PMID: 27871476</a> ).                                                                                                    |

Acronyms - DOID: Human Disease Ontology; NCBIGene: National Center for Biotechnology Information Entrez gene identifier.
